# Supplementary material for: Green synthesis of broccoli-derived carbon quantum dots as effective photosensitizers for the PDT effect testified in the model of mutant Caenorhabditis elegans
Source: Royal Society of Chemistry journal article supplement (doi:10.1039/d2bm00274d), 2022-01-01
Supplement: d2bm00274d1.pdf [file d2bm00274d1.pdf]

## Supplementary information

### **Green synthesis of broccoli-derived carbon quantum dots as the effective photosensitizer for PDT effect testified in the model of mutant *Caenorhabditis elegans***

Shereen M. El-Sherbiny <sup>a,b,c</sup>, Changsheng Shao<sup>a,b</sup>, Adolf Acheampong<sup>a,b</sup>, Mahmoud A. Khalifa <sup>c,d</sup> Chao Liu <sup>a,b</sup> and Qing Huang<sup>a, b,\*</sup>

---

<sup>a</sup> CAS Key Laboratory of High Magnetic Field and Ion Beam Physical Biology, Anhui Key Laboratory of Environmental Toxicology and Pollution Control Technology, Institute of Intelligent Machine, Hefei Institutes of Physical Science, Chinese Academy of Sciences, Hefei 230031, China.

<sup>b</sup> Science Island Branch of Graduate School, University of Science and Technology of China, Hefei 230026, China

<sup>c</sup> Department of Physics, Faculty of Science, Mansoura University, Mansoura 35516, Egypt

<sup>d</sup> Hefei National Laboratory for Physical Sciences at the Microscale, University of Science and Technology of China, Hefei 230026, P.R. China

\*Corresponding author: Prof. Qing Huang. Email: [huangq@ipp.ac.cn](mailto:huangq@ipp.ac.cn)

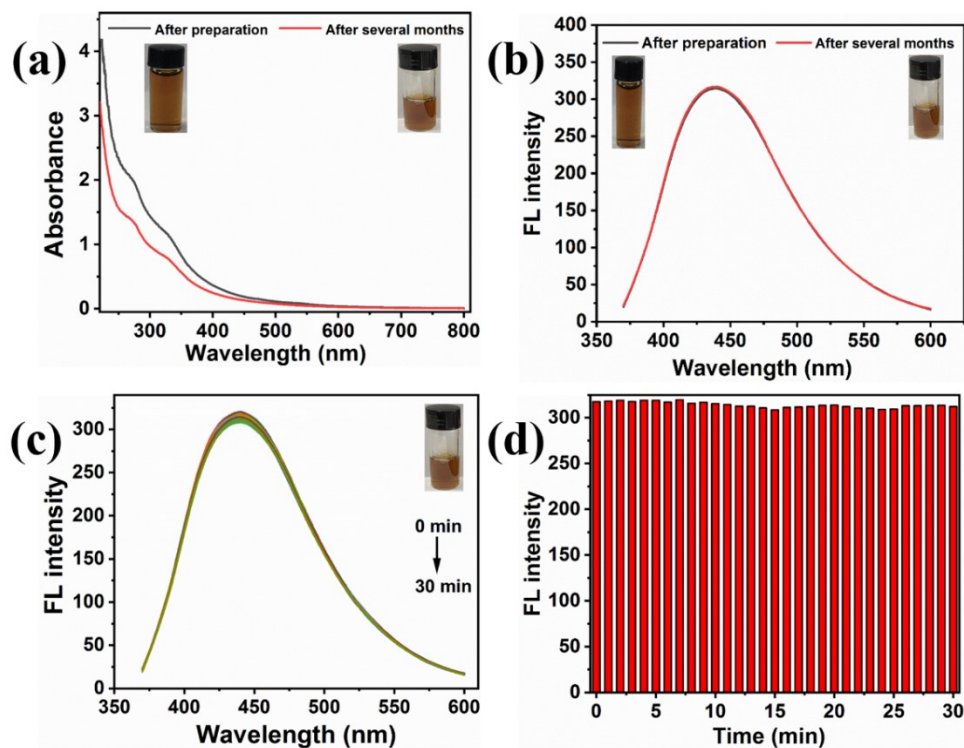

**Figure S1.** a) UV-vis absorption spectrum of BCQDs. b) Fluorescence spectrum of BCQDs. c) Fluorescence spectrum of BCQDs stored for several months under irradiated at 660 nm. d) Fluorescence intensity of the stored BCQDs with the time of irradiation at 660 nm for 30 min. (Insert images of as-synthesized BCQDs and stored for several months)

Table S1 Comparison of singlet oxygen quantum yield with that of the literature

| Photosensitizer                  | $^1\text{O}_2$ QY | Reference |
|----------------------------------|-------------------|-----------|
| Copper-Doped Carbon Dots         | 0.36              | 1         |
| Magnetofluorescent Mn-CDs        | 0.40              | 2         |
| Hypocrella Bambusae- derived CDs | 0.38              | 3         |
| Broccoli- derived CQDs           | 0.42              | This work |

References:

1. J. Wang, M. Xu, D. Wang, Z. Li, F. L. Primo, A. C. Tedesco and H. Bi, *Inorg Chem*, 2019, 58, 13394-13402.
2. Q. Jia, J. Ge, W. Liu, X. Zheng, S. Chen, Y. Wen, H. Zhang and P. Wang, *Adv Mater*, 2018, 30, e1706090.
3. Q. Jia, X. Zheng, J. Ge, W. Liu, H. Ren, S. Chen, Y. Wen, H. Zhang, J. Wu and P. Wang, *J Colloid Interface Sci*, 2018, 526, 302-311.
